# Supplementary material for: Pseudopterosin Inhibits Proliferation and 3D Invasion in Triple Negative Breast Cancer by Agonizing Glucocorticoid Receptor Alpha
Source: Preprints.org preprint supplement (doi:10.20944/preprints201807.0224.v1), 2018-07-13
Supplement: Supplementary file 1 [file supplementary]

# 1 Supporting Information

## 2 Pseudopterosin Inhibits Proliferation and 3D 3 Invasion in Triple Negative Breast Cancer by 4 Agonizing Glucocorticoid Receptor Alpha

5 Julia Sperlich<sup>1</sup> and Nicole Teusch<sup>1,\*</sup>

6 <sup>1</sup> Bio-Pharmaceutical Chemistry & Molecular Pharmacology, Faculty of Applied Natural Sciences,  
7 Technische Hochschule Koeln, Chempark, 51373 Leverkusen, Germany

8 \* Correspondence: [nicole.teusch@th-koeln.de](mailto:nicole.teusch@th-koeln.de); Tel.: +0214-32834-4623

9

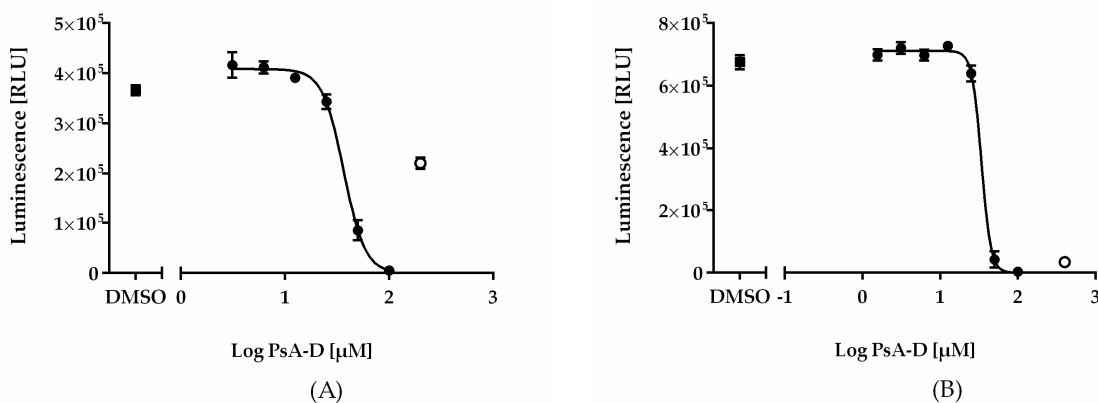

10 **S1. Cell Viability of MDA-MB-231 cells after pseudopterosin treatment.** Increasing amounts of  
11 PsA-D were incubated for either 24 hours showing an  $IC_{50}$  value of 31.4 µM (A) or for 48 hours  
12 leading to an  $IC_{50}$  value of 32.16 µM (B). Staurosporine (white circles) serves as positive control and  
13 DMSO as negative control. Error bars were calculated using  $\pm$ SEM. Graphs represent exemplary  
14 data. Means of  $IC_{50}$  values were calculated of three independent experiments.

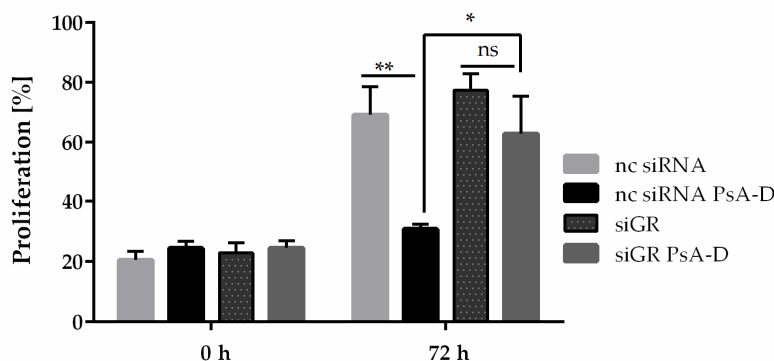

15

16 **S2. Pseudopterosin failed to inhibit breast cancer cell proliferation after knockdown of the**  
17 **glucocorticoid receptor alpha (GRα) after 72 hours.** Knockdown of GRα was done with the Lonza  
18 Nucleofector 2b device. The cells were seeded and proliferating cells were imaged with the  
19 IncuCyte® ZOOM every hour. Confluency of cells was determined with IncuCyte® software  
20 indicated in proliferation in percent. Cells were treated with a concentration of 15 µM of PsA-D. The  
21 bar diagram shows the proliferation rate at time points 0 and 72 hours. The data represent means of  
22 three independent experiments. Error bars were calculated using  $\pm$ SEM. Two stars represent a  
23 significance of  $p < 0.01$  and one star of  $p < 0.05$ .

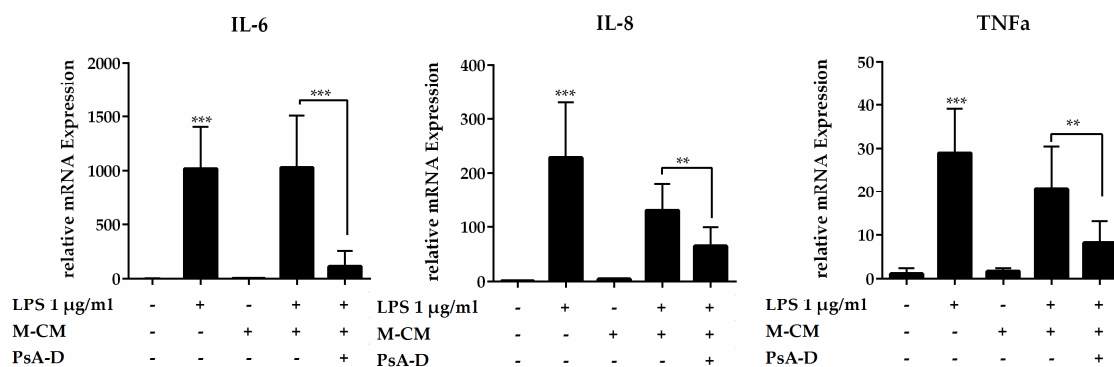

24

25

26

27

28

29

30

31

**S3. Pseudopterosin inhibited bidirectional communication between triple negative breast cancer (TNBC) and peripheral blood mononuclear cells (PBMC).** Tumor-conditioned medium of MDA-MB-231 cells was produced using 1 µg/ml LPS and  $1 \times 10^6$  cells per ml. After 24 hours of incubation, tumor conditioned medium (MDA-MB-231-conditioned medium, M-CM) was harvested, centrifuged and sterile filtered. Afterwards, M-CM was added at 25 volume percentages to  $1 \times 10^6$  cells per ml of PBMC. After 5 hours of incubation, cells were harvested, RNA isolated and analyzed with qPCR.

32

33

34

35

36

37

38

39

**Supplementary Method 1:** Measurement of cell viability: MDA-MB-231 cells were seeded at a density of  $2.8 \times 10^5$  cells per ml in 384 well plates (Greiner Bio-One, Kremsmuenster, Austria) with the CyBio pipetting robot (Analytic Jena AG, Jena, Germany). The cells were incubated for 24 hours at 37°C before treatment. Compounds were added at different concentrations and incubated for 24 or 48 hours, respectively. Measurement of cell viability was performed with CellTiterGlo® from Promega (Darmstadt, Germany) according to the manufacturer's instructions.

40

41

42

43

44

45

46

47

**Supplementary Method 2:** Production of conditioned medium (CM) from MDA-MB-231 cells: MDA-MB-231 cells were seeded at a density of  $1 \times 10^6$  cells into a 25 cm<sup>2</sup> flask. Cells were either stimulated with 1 µg/mL LPS or without, serving as a negative control. MDA-MB-231 conditioned media (M-CM) was collected after 24 hours, centrifuged and sterile filtered. Peripheral blood mononuclear cells (PBMC) were freshly thawed and seeded at  $1 \times 10^6$  cells per ml. PsA-D was added at a concentration of 30 µM for 20 minutes followed by addition of 25 volume percentage of M-CM for 5 hours. Cells were then harvested and RNA isolated with RNase Mini Kit (Qiagen, Hilden, Germany) for further quantitative realtime PCR analysis.
